# Supplementary material for: La República hiperpolítica: la política en la era de la cibercultura y la mundialización
Source: Royal Society of Chemistry journal article supplement (doi:10.1039/c2nr31716h), 2005-01-01
Supplement: c2nr31716h.pdf [file c2nr31716h.pdf]

## Supporting Information

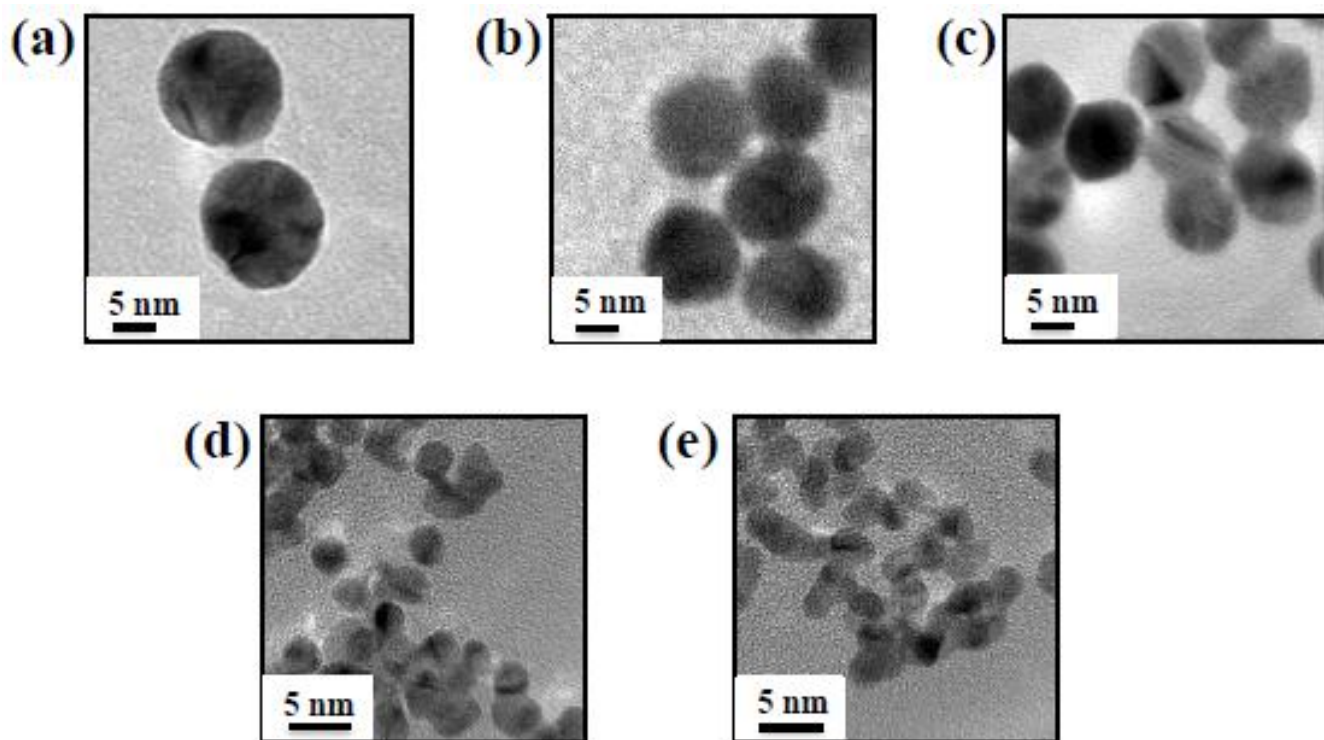

**Fig. S1.** TEM images depicting the enlarged view of the (a) Au NPs and (b–e) Pt/Au NPs prepared at  $[\text{Au}^{3+}]/[\text{Pt}^{4+}]$  molar ratios of (b) 9.5/0.5, (c) 9.0/1.0, (d) 8.0/2.0, and (e) 7.0/3.0. Other conditions were the same as those described in Fig. 1.

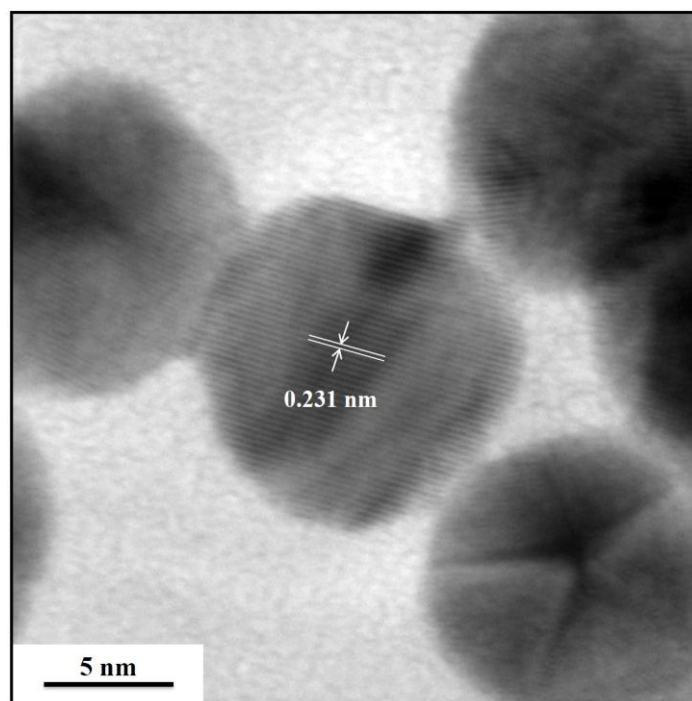

**Fig. S2.** High-resolution transmission electron microscopy (HR-TEM) image of Pt<sub>0.1</sub>/Au NPs. Other conditions were the same as those described in Fig. 1.

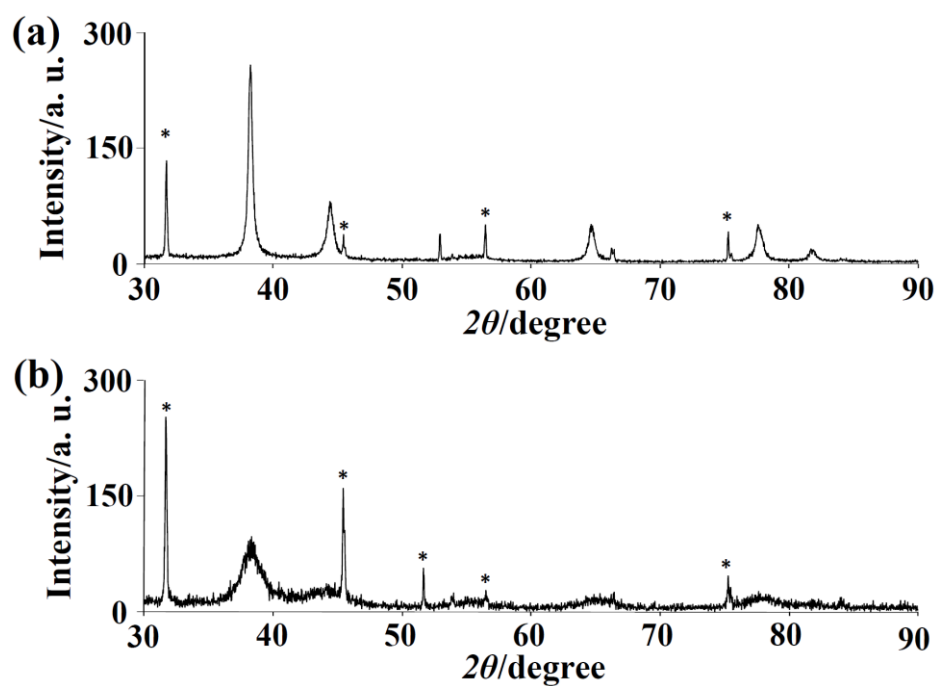

**Fig. S3.** XRD patterns of (a) Au NPs and (b) Pt<sub>0.1</sub>/Au NPs. The peaks labeled with asterisks are assigned to the diffraction of the silicon wafer substrate. Other conditions were the same as those described in Fig.

1.

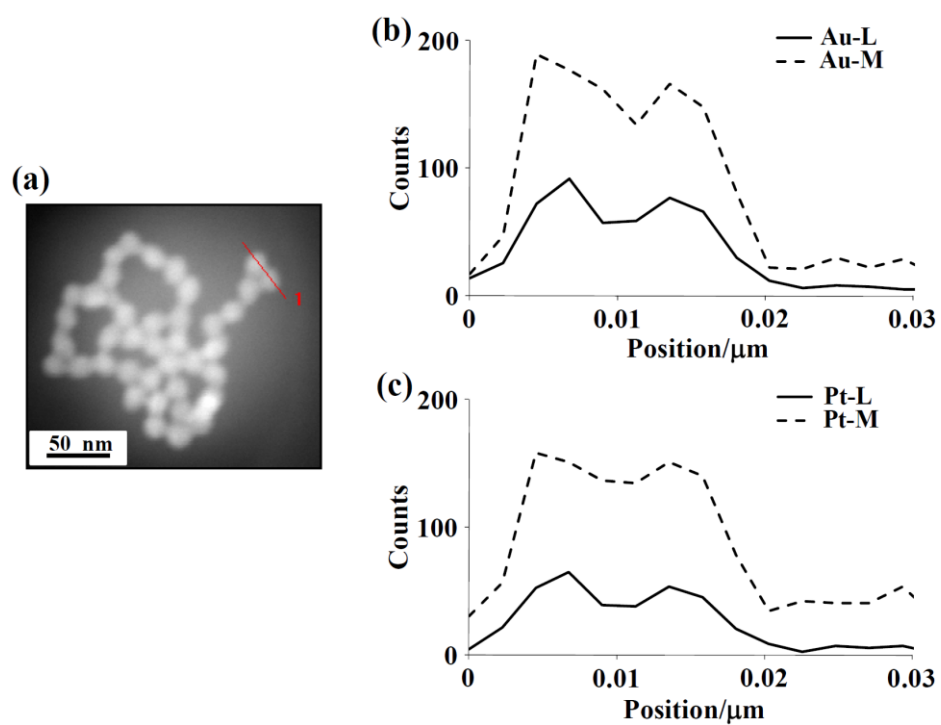

**Fig. S4.** (a) SEM image of Pt<sub>0.1</sub>/Au NPs and STEM-EDS mapping of (b) Au and (c) Pt in the region marked in (a) by the red line. Other conditions were the same as those described in Fig. 1.

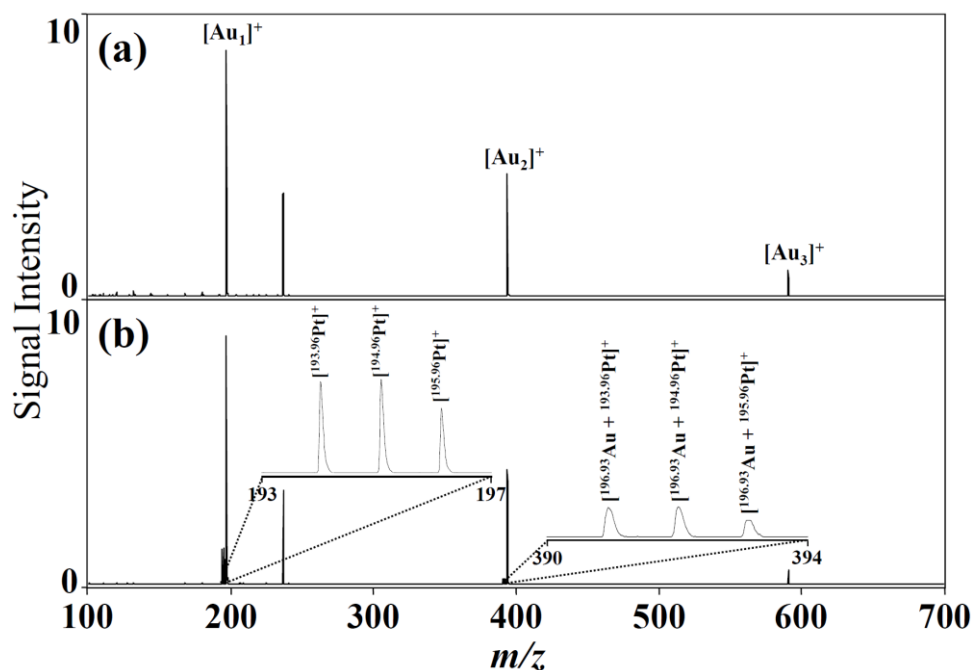

**Fig. S5.** SALDI-MS spectra of solutions containing (a) Au NPs (1X) and (b) Pt<sub>0.1</sub>/Au NPs (1X) in a 5.0 mM Tris-borate solution (pH 7.0). The peaks at *m/z* 196.97, 393.93, and 590.90 in (a) are assigned to [Au<sub>1</sub>]<sup>+</sup>, [Au<sub>2</sub>]<sup>+</sup>, and [Au<sub>3</sub>]<sup>+</sup> ions, respectively. The peaks at *m/z* 390.89, 391.89, and 392.89 in (b) correspond to [<sup>196.93</sup>Au + <sup>193.96</sup>Pt]<sup>+</sup>, [<sup>196.93</sup>Au + <sup>194.96</sup>Pt]<sup>+</sup>, and [<sup>196.93</sup>Au + <sup>195.96</sup>Pt]<sup>+</sup> ions, respectively. 1,000 pulsed laser shots were applied, and we accumulated the signals from 10 MALDI target positions under a laser fluence of 45 μJ. Other conditions were the same as those described in Fig. 1.

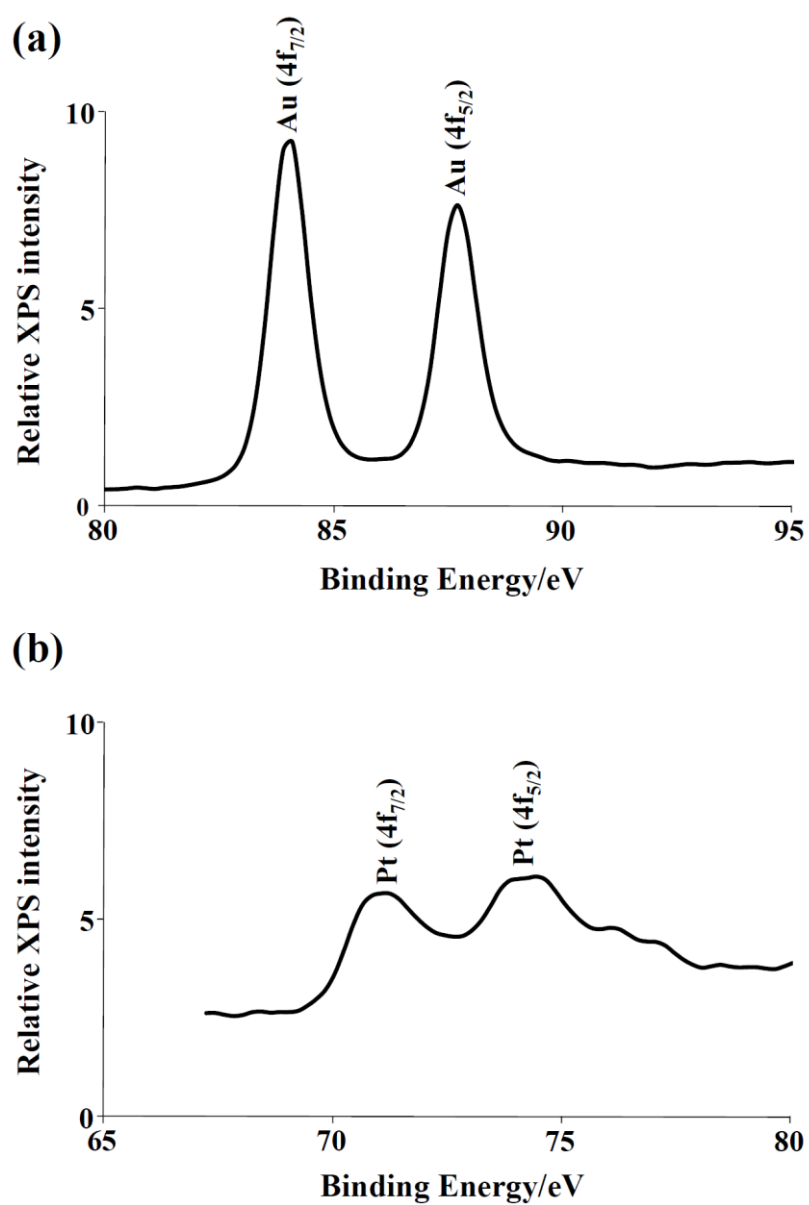

**Fig. S6.** (a) Au 4f and (b) Pt 4f core-level photoelectron spectra of Pt<sub>0.1</sub>/Au NPs applied onto silicon substrates and measured at room temperature. Other conditions were the same as those described in Fig.

1.

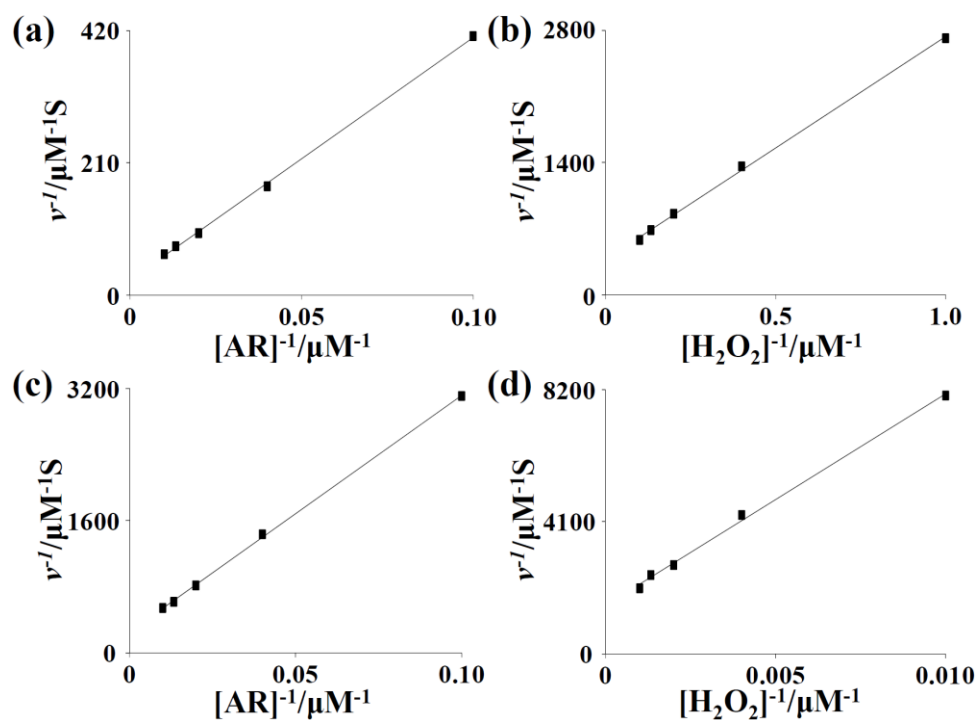

**Fig. S7.** Double reciprocal plots of activity of (a), (b) HRP and (c), (d)  $\text{Pt}_{0.1}/\text{Au}$  NPs with the concentration of one substrate fixed and the other [(a), (c) AR or (b), (d)  $\text{H}_2\text{O}_2$ ] varied. The velocity ( $v$ ) of the reaction was measured using (a), (b) 0.15 nM HRP or (c), (d) 0.01X  $\text{Pt}_{0.1}/\text{Au}$  NPs in a 5.0-mM Tris-borate solution (pH 7.0). (a), (c) The concentration of  $\text{H}_2\text{O}_2$  was 0.5 mM for HRP or 2.5 mM for  $\text{Pt}_{0.1}/\text{Au}$  NPs, and the AR concentration was varied. (b), (d) The concentration of AR was 10  $\mu\text{M}$  and the  $\text{H}_2\text{O}_2$  concentration was varied. Other conditions were the same as those described in Fig. 3.

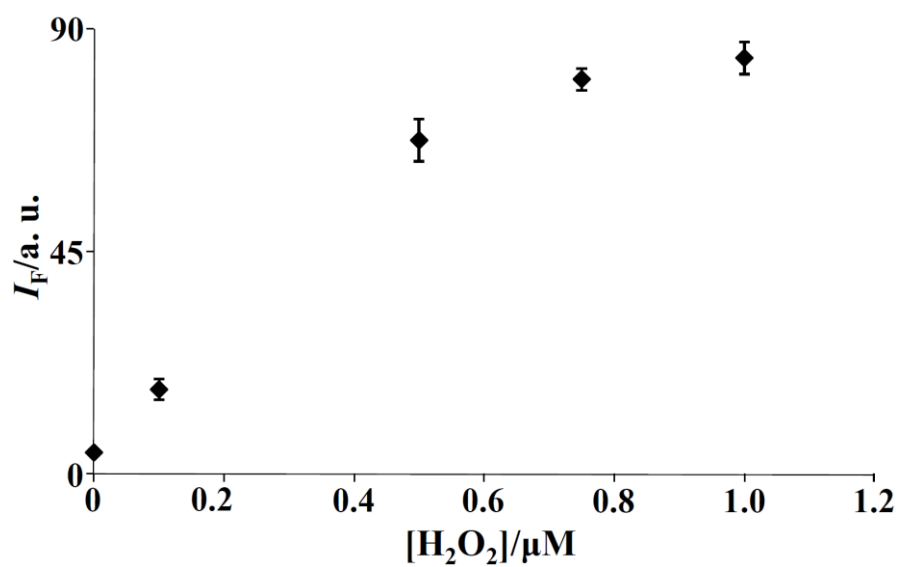

**Fig. S8.** Plot of fluorescence intensity of Tris-borate solutions (5 mM, pH 7.0) containing AR (10  $\mu M$ ) and Pt<sub>0.1</sub>/Au NPs (0.01X) at 585 nm in the presence of H<sub>2</sub>O<sub>2</sub> (0–1.0  $\mu M$ ); error bars represent the standard deviations from three repeated experiments.



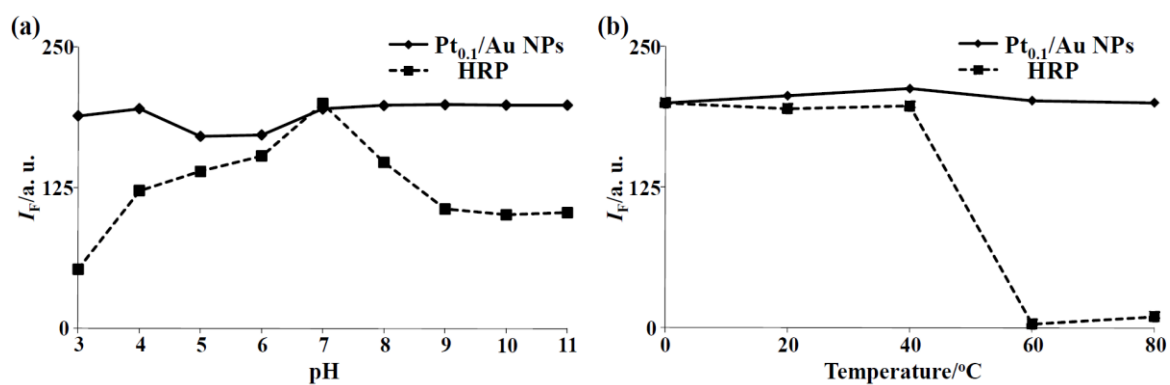

**Fig. S9.** Comparison of the stability of Pt<sub>0.1</sub>/Au NPs and HRP. (a) Pt<sub>0.1</sub>/Au NPs or HRP were first incubated in sodium phosphate solution at pH 3–11 for 2 h, and then, their peroxidase activities were measured under the conditions described in Fig. 3. (b) Pt<sub>0.1</sub>/Au NPs or HRP were first incubated at 0–80 °C for 2 h, and then, the peroxidase activity was measured under the conditions described in Fig. 3.

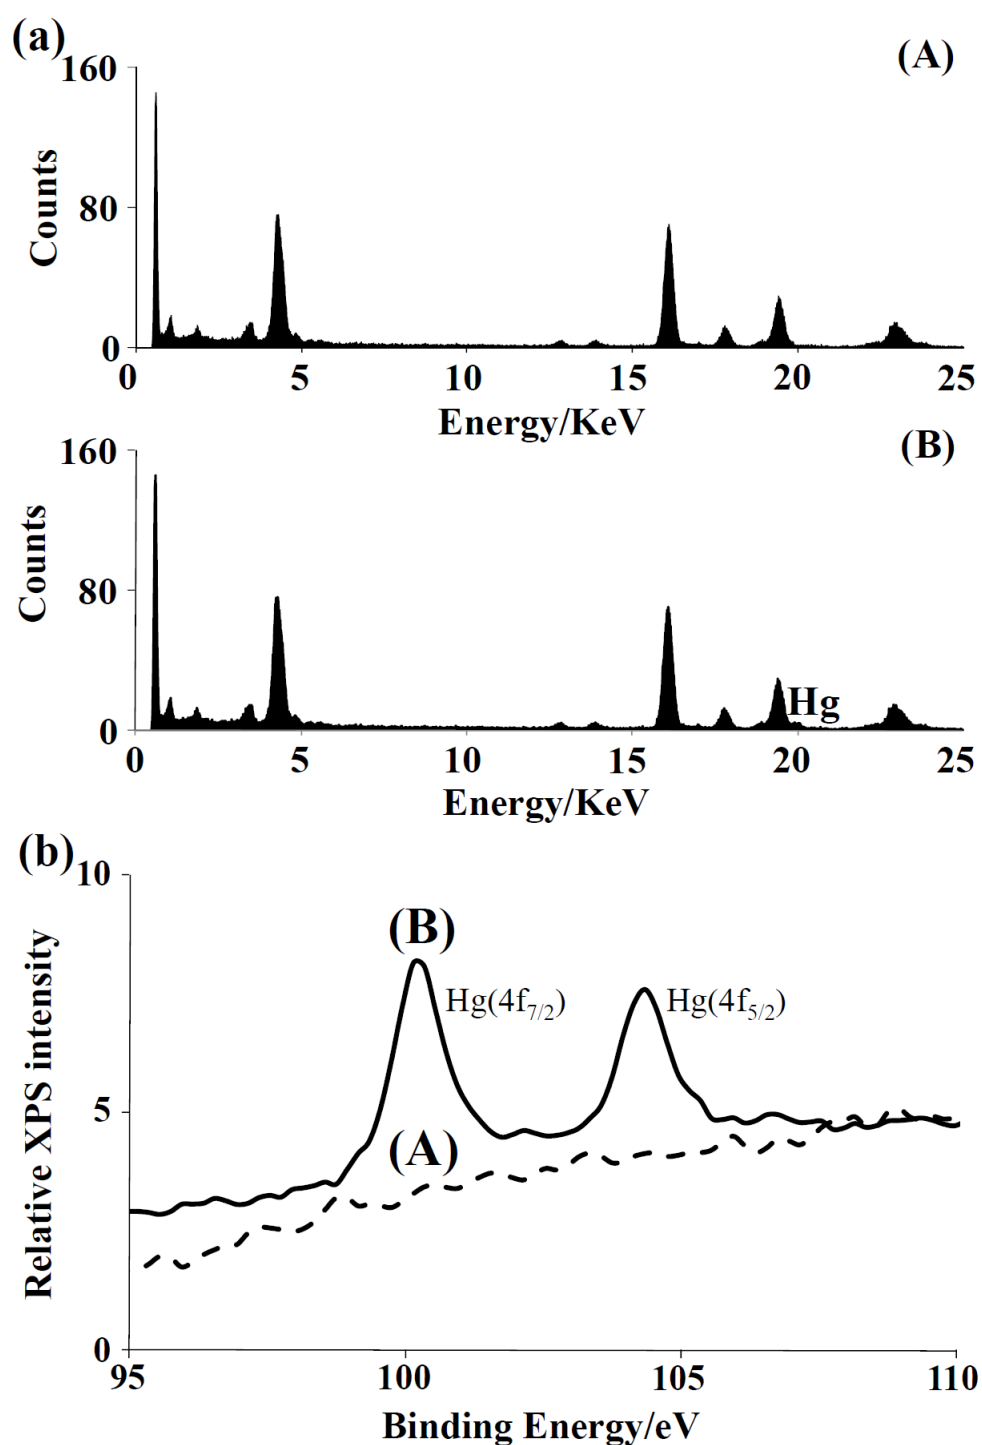

**Fig. S10.** (a) EDS and (b) XPS spectra of Pt<sub>0.1</sub>/Au NPs (0.01X) in the (A) absence and (B) presence of Hg<sup>2+</sup> (10 μM). Other conditions were the same as those described in Fig. 4.

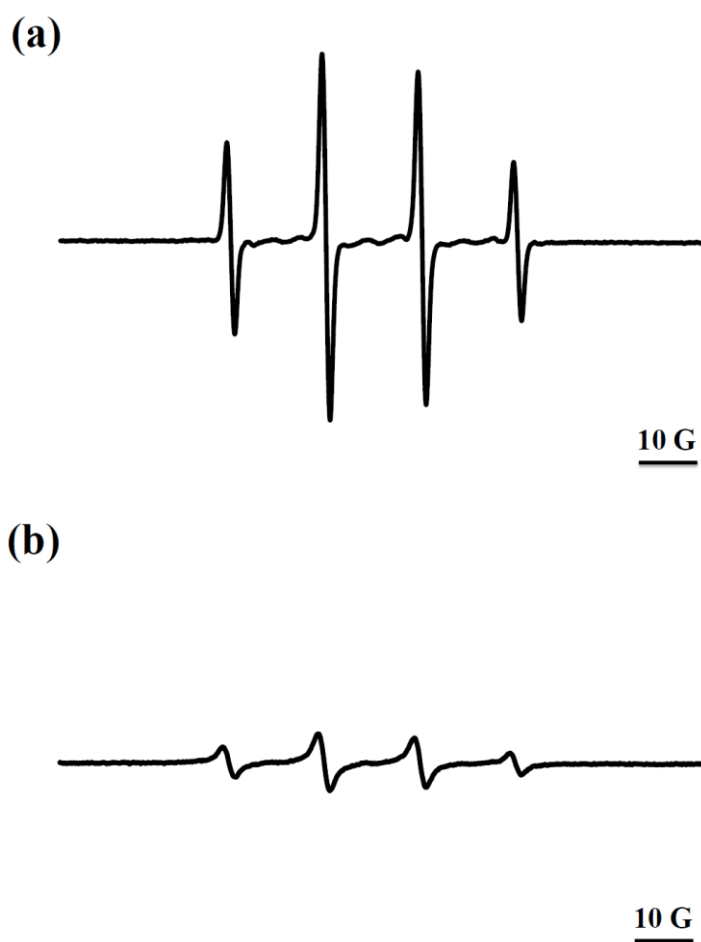

**Fig. S11.** EPR spectra of hydroxyl radicals in the systems of (a) DMPO (50 mM) and H<sub>2</sub>O<sub>2</sub> (50 mM), and Pt<sub>0.1</sub>/Au NPs (0.1X) and (b) DMPO (50 mM), H<sub>2</sub>O<sub>2</sub> (50 mM), Pt<sub>0.1</sub>/Au NPs (0.1X), and Hg<sup>2+</sup> (10 μM). Samples were exposed to 15 min of UV light at 270 nm. EPR experiments were run on a Bruker EMX spectrometer. EPR conditions: microwave power, 1 mW; field modulation, 1 G; scan width, 100 G. Other conditions were the same as those described in Fig. 4.

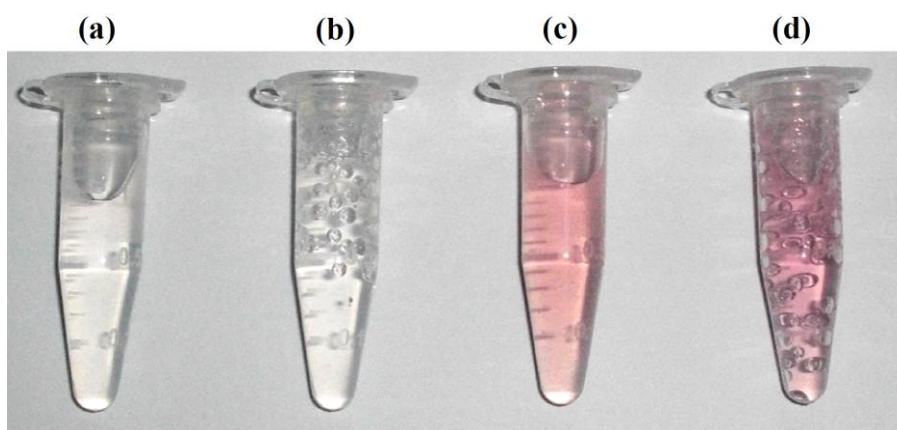

**Fig. S12.** Photograph of 5.0-mM Tris-borate solution (pH 7.0) containing (a) 50 mM  $\text{H}_2\text{O}_2$ ; (b) 50 mM  $\text{H}_2\text{O}_2$  and catalase (1.5 nM  $\approx$  0.13 unit/mL); (c) 50 mM  $\text{H}_2\text{O}_2$  and  $\text{Pt}_{0.1}/\text{Au}$  NPs (0.1X  $\approx$  2 nM); and (d) 50 mM  $\text{H}_2\text{O}_2$ ,  $\text{Pt}_{0.1}/\text{Au}$  NPs (0.1X  $\approx$  2 nM), and  $\text{Hg}^{2+}$  (10  $\mu\text{M}$ ). Incubation, 20 min. Addition of  $\text{Hg}^{2+}$  into the mixture of  $\text{H}_2\text{O}_2$  and  $\text{Pt}_{0.1}/\text{Au}$  NPs results in the acceleration of bubble formation (vial d). Other conditions were the same as those described in Fig. 4.

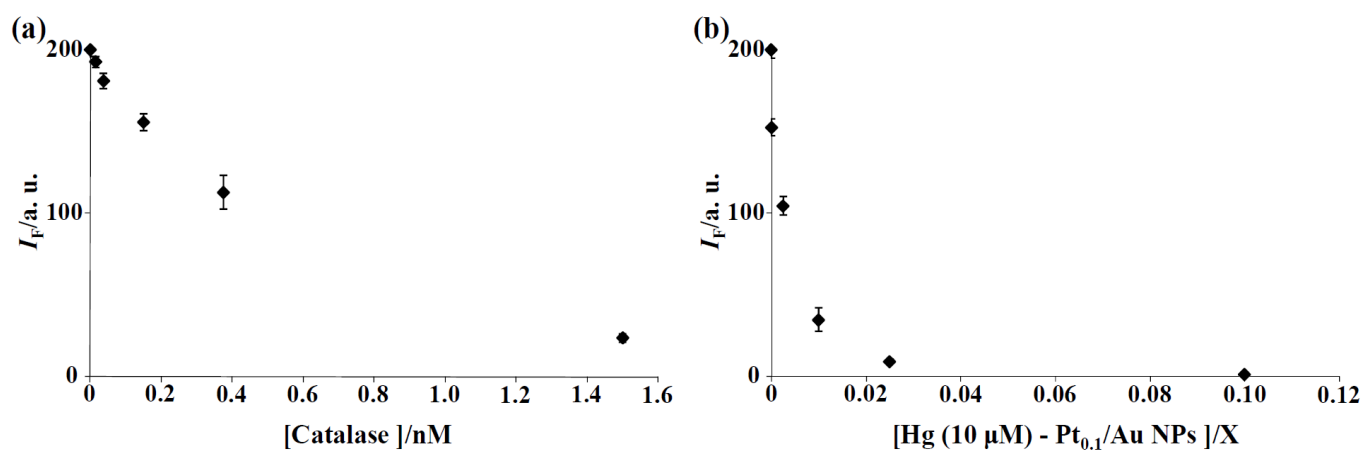

**Fig. S13.** Detection of the activity of (a) catalase and (b) Hg–Pt<sub>0.1</sub>/Au NPs using the Amplex<sup>®</sup> UltraRed reagent-based assay. The activity of 1.0 nM catalase is about 0.087 unit/mL. The concentration of 0.1X Pt<sub>0.1</sub>/Au NPs is about 2.0 nM. Initially, each reaction contained the indicated amounts of catalase or Hg (10  $\mu$ M)–Pt<sub>0.1</sub>/Au NPs and 10  $\mu$ M H<sub>2</sub>O<sub>2</sub> in a 5.0 mM Tris-borate solution (pH 7.0) and was incubated for 30 min. The final reaction solution containing Amplex<sup>®</sup> UltraRed (10  $\mu$ M) and 1.32 U/mL HRP was incubated at 37°C. After 30 min, fluorescence was measured in a fluorescence microplate reader using excitation at 530 nm and fluorescence detection at 590 nm. Error bars represent the standard deviations from four repeated experiments.

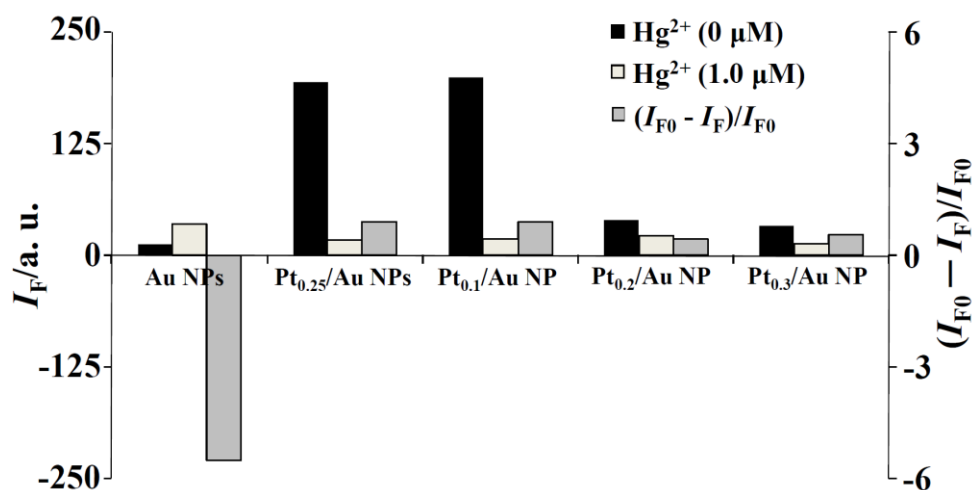

**Fig. S14.** Fluorescence intensities (at 585 nm) of a 5-mM Tris-borate solution (pH 7.0) containing 50 mM H<sub>2</sub>O<sub>2</sub>, AR (10  $\mu$ M) and various Au NPs or Pt<sub>0.1</sub>/Au NPs in the absence (black bar,  $I_{F0}$ ) and presence of 1.0  $\mu$ M Hg<sup>2+</sup> (white bar,  $I_F$ ). Relative fluorescence increases [gray bar,  $(I_{F0} - I_F)/I_{F0}$ ] at 585 nm of the probe for detection of Hg<sup>2+</sup> (1.0  $\mu$ M). Other conditions were the same as those described in Fig. 4.

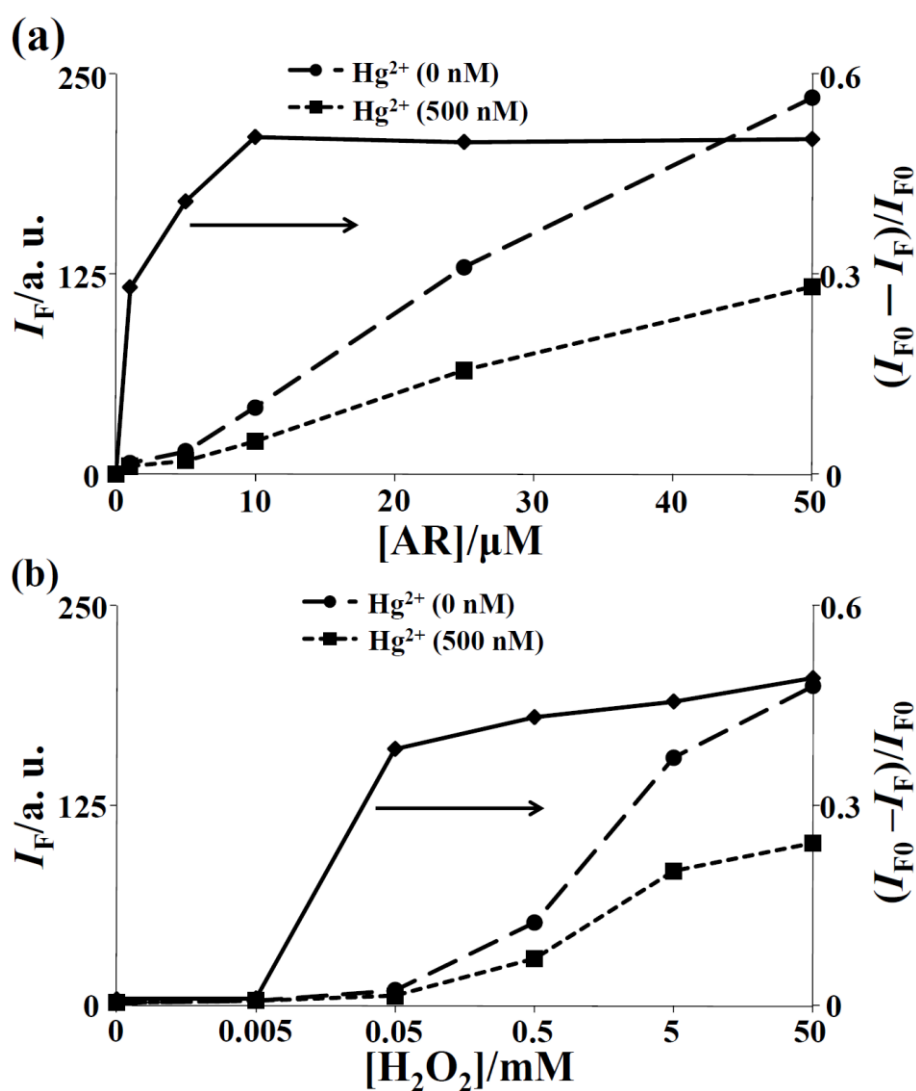

**Fig. S15.** Effect of the concentration of (a) AR and (b) H<sub>2</sub>O<sub>2</sub> on the detection of Hg<sup>2+</sup> (500 nM) by AR-Pt<sub>0.1</sub>/Au NPs probe.  $I_{F0}$  and  $I_F$  are the fluorescence intensities of the AR-Pt<sub>0.1</sub>/Au NPs (0.01X) solution in the absence and presence of Hg<sup>2+</sup>, respectively. Other conditions were the same as those described in Fig. 4.

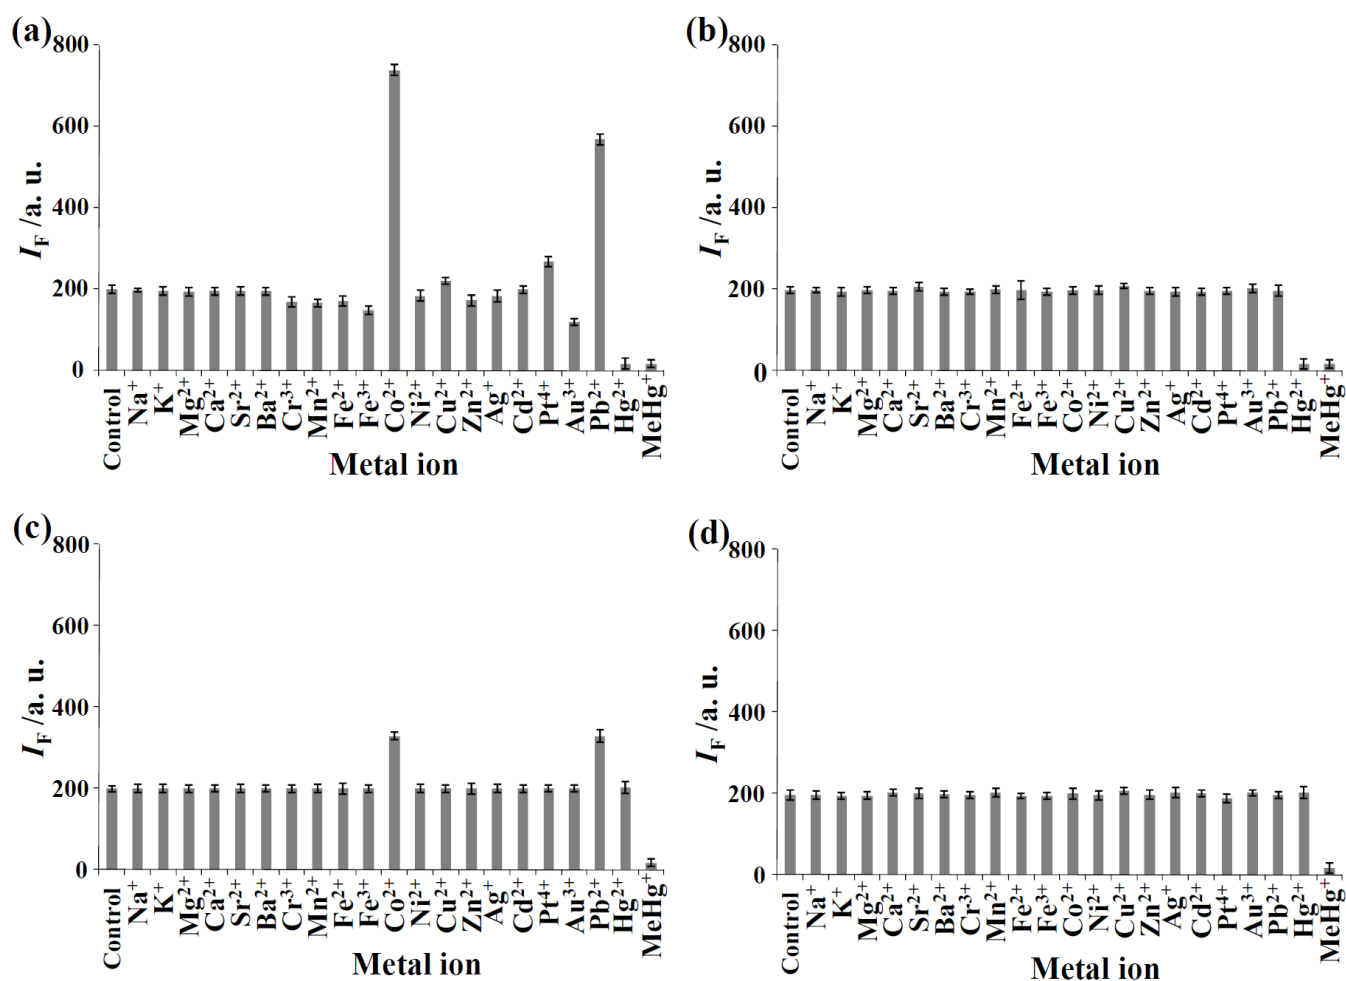

**Fig. S16.** Selectivities of the AR-Pt<sub>0.1</sub>/Au NPs sensor for different metal ions (1.0 μM) and mercury species (1.0 μM) in the (a) absence and presence (b–d) of masking agents (b) 0.1% PAA, (c) 0.3 nM Te NW, and (d) 0.1% PAA and 0.3 nM Te NW. Error bars represent the standard deviations from five repeated experiments. Other conditions were the same as those described in Fig. 4.



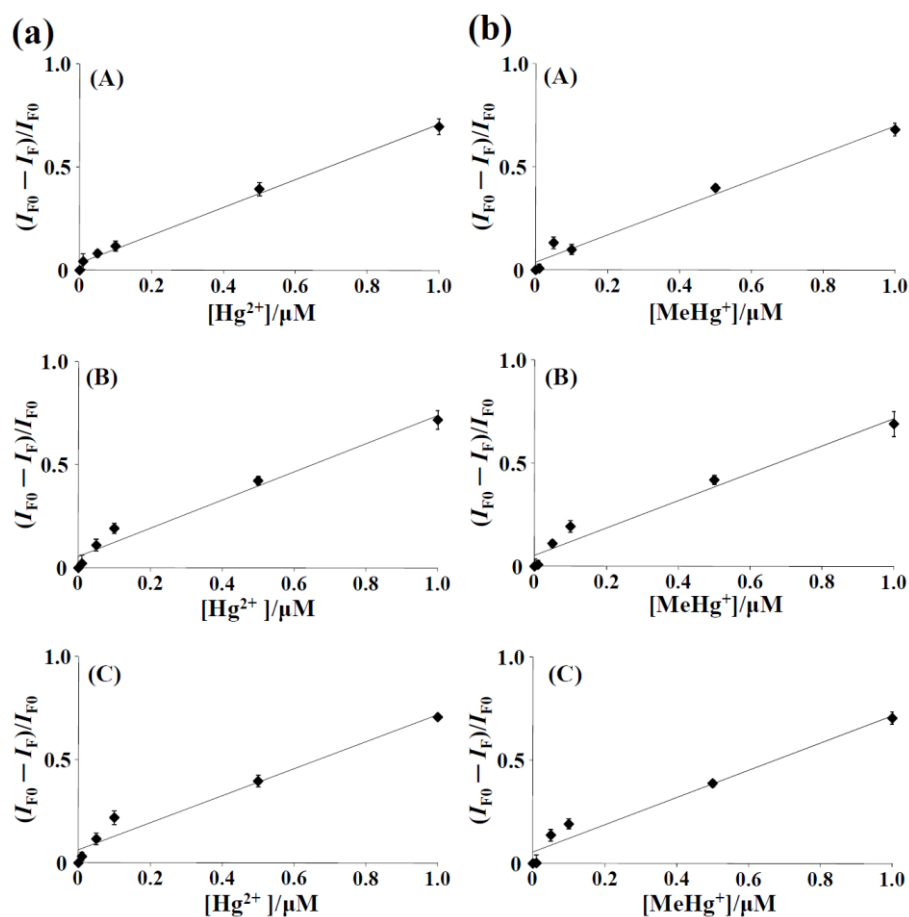

**Fig. S17.** Analyses of representative (A) tap water, (B) pond water, and (C) stream water samples using (a) AR-Pt<sub>0.1</sub>/Au NPs-PAA and (b) AR-Pt<sub>0.1</sub>/Au NPs-PAA/Te NWs probes for  $Hg^{2+}$  and  $MeHg^+$ , respectively. Diluted water samples (twofold) were spiked with  $Hg^{2+}$  (0–1.0  $\mu M$ ) and  $MeHg^+$  (0–1.0  $\mu M$ ), respectively. Other conditions were the same as those described in Fig. 5.
